# Supplementary material for: Assembly of organometallic networks with multinuclear silver(i)–ethynediide supramolecular synthon, trifluoroacetate and ligands derived from isomeric dicyanobenzenes
Source: Royal Society of Chemistry journal article supplement (doi:10.1039/c3ce41671b), 2013-11-19
Supplement: c3ce41671b.pdf [file c3ce41671b.pdf]

## Assembly of Organometallic Networks with Multinuclear Silver(I)-Ethyne-1,2-dithiolate Supramolecular Synthons, Trifluoroacetate and Ligands Derived from Isomeric Dicyanobenzenes

### Supporting Information

**Table S1.** X-ray crystal data and structure refinement parameters.

| Compound                                      | 1                                                                                                  | 2                                                                                                  | 3                                                                              | 4                                                                              | 5                                                                                              | 6                                                                                                  |
|-----------------------------------------------|----------------------------------------------------------------------------------------------------|----------------------------------------------------------------------------------------------------|--------------------------------------------------------------------------------|--------------------------------------------------------------------------------|------------------------------------------------------------------------------------------------|----------------------------------------------------------------------------------------------------|
| Empirical formula                             | C <sub>48</sub> H <sub>12</sub> Ag <sub>14</sub> F <sub>30</sub> N <sub>6</sub><br>O <sub>20</sub> | C <sub>56</sub> H <sub>16</sub> Ag <sub>15</sub> F <sub>30</sub> N <sub>9</sub><br>O <sub>23</sub> | C <sub>22</sub> H <sub>12</sub> Ag <sub>6</sub> F <sub>6</sub> O <sub>13</sub> | C <sub>22</sub> H <sub>9</sub> Ag <sub>6</sub> F <sub>6</sub> NO <sub>10</sub> | C <sub>26</sub> H <sub>16</sub> Ag <sub>8</sub> F <sub>12</sub> N <sub>2</sub> O <sub>16</sub> | C <sub>56</sub> H <sub>20</sub> Ag <sub>16</sub> F <sub>18</sub> N <sub>4</sub><br>O <sub>24</sub> |
| Formula weight                                | 3072.82                                                                                            | 3370.83                                                                                            | 1245.54                                                                        | 1208.52                                                                        | 1703.37                                                                                        | 3200.68                                                                                            |
| Crystal system                                | Monoclinic                                                                                         | Monoclinic                                                                                         | Monoclinic                                                                     | Monoclinic                                                                     | Triclinic                                                                                      | Monoclinic                                                                                         |
| Space group                                   | <i>P</i> 2 <sub>1</sub> / <i>c</i> (No.14)                                                         | <i>C</i> 2/ <i>c</i> (No. 15)                                                                      | <i>P</i> 2 <sub>1</sub> / <i>n</i> (No.14)                                     | <i>P</i> 2 <sub>1</sub> / <i>c</i> (No.14)                                     | <i>P</i> -1 (No. 2)                                                                            | <i>P</i> 2 <sub>1</sub> / <i>n</i> (No.14)                                                         |
| <i>a</i> [Å]                                  | 8.300(5)                                                                                           | 19.894(9)                                                                                          | 6.904(5)                                                                       | 18.999(3)                                                                      | 8.222(7)                                                                                       | 27.310(3)                                                                                          |
| <i>b</i> [Å]                                  | 31.638(2)                                                                                          | 26.220(1)                                                                                          | 18.743(2)                                                                      | 17.422(2)                                                                      | 16.225(1)                                                                                      | 8.465(8)                                                                                           |
| <i>c</i> [Å]                                  | 27.360(2)                                                                                          | 17.945(1)                                                                                          | 22.419(2)                                                                      | 8.262(1)                                                                       | 16.461(1)                                                                                      | 32.750(3)                                                                                          |
| $\alpha$ [°]                                  | 90                                                                                                 | 90                                                                                                 | 90                                                                             | 90                                                                             | 93.275(2)                                                                                      | 90                                                                                                 |
| $\beta$ [°]                                   | 95.450(1)                                                                                          | 119.636(1)                                                                                         | 97.687(1)                                                                      | 96.619(2)                                                                      | 95.797(1)                                                                                      | 109.776(2)                                                                                         |
| $\gamma$ [°]                                  | 90                                                                                                 | 90                                                                                                 | 90                                                                             | 90                                                                             | 97.895(1)                                                                                      | 90                                                                                                 |
| <i>V</i> [Å <sup>3</sup> ]                    | 7151.7(7)                                                                                          | 8136.4(8)                                                                                          | 2875.0(4)                                                                      | 2716.4(6)                                                                      | 2158.4(3)                                                                                      | 7124.2(1)                                                                                          |
| <i>Z</i>                                      | 4                                                                                                  | 4                                                                                                  | 4                                                                              | 4                                                                              | 2                                                                                              | 4                                                                                                  |
| <i>D</i> <sub>calc</sub> (g/cm <sup>3</sup> ) | 2.854                                                                                              | 2.752                                                                                              | 2.878                                                                          | 2.955                                                                          | 2.565                                                                                          | 2.984                                                                                              |
| $\mu$ (Mo-K $\alpha$ )(mm <sup>-1</sup> )     | 3.888                                                                                              | 3.664                                                                                              | 4.112                                                                          | 4.340                                                                          | 3.660                                                                                          | 4.413                                                                                              |
| <i>F</i> (000)                                | 5720                                                                                               | 6296                                                                                               | 2336                                                                           | 2256                                                                           | 1556                                                                                           | 5960                                                                                               |
| Reflections collected                         | 101304                                                                                             | 56209                                                                                              | 26954                                                                          | 17852                                                                          | 32274                                                                                          | 107180                                                                                             |

|                                              |       |       |       |       |       |       |
|----------------------------------------------|-------|-------|-------|-------|-------|-------|
| Independent reflections                      | 17086 | 9793  | 6962  | 4893  | 10298 | 17155 |
| Observed reflections<br>[ $I > 2\sigma(I)$ ] | 14658 | 8515  | 5746  | 3899  | 8480  | 13555 |
| Parameters                                   | 1063  | 601   | 456   | 408   | 552   | 1063  |
| Goodness-of-fit                              | 1.099 | 1.070 | 1.022 | 1.077 | 1.052 | 1.114 |
| $R_1[I > 2\sigma(I)]^a$                      | 0.080 | 0.054 | 0.048 | 0.098 | 0.090 | 0.085 |
| $wR_2(\text{all data})^b$                    | 0.204 | 0.157 | 0.136 | 0.247 | 0.244 | 0.236 |

---

$^a R_1 = \sum ||F_o| - |F_c|| / \sum |F_o|$ .  $^b wR_2 = \{ \sum [w(F_o^2 - F_c^2)^2] / \sum [w(F_o^2)^2] \}^{1/2}$

**Table S2.** Selected Bond Lengths (Å) for Complexes **1–6**.

| <b>1</b>       |          |                |          |                |          |
|----------------|----------|----------------|----------|----------------|----------|
| C(1)≡C(2)      | 1.245(1) | C(3)≡C(4)      | 1.238(1) | Ag(1)-C(1)     | 2.308(8) |
| Ag(4)-C(1)     | 2.505(8) | Ag(5)-C(1)     | 2.255(9) | Ag(6)-C(1)     | 2.176(8) |
| Ag(1)-C(2)     | 2.648(8) | Ag(2)-C(2)     | 2.273(8) | Ag(3)-C(2)     | 2.138(8) |
| Ag(4)-C(2)     | 2.396(8) | Ag(7)-C(2)     | 2.517(8) | Ag(1)-C(3)#1   | 2.661(8) |
| Ag(7)-C(3)     | 2.555(8) | Ag(8)-C(3)     | 2.163(7) | Ag(9)-C(3)     | 2.404(8) |
| Ag(12)-C(3)    | 2.186(8) | Ag(7)-C(4)     | 2.559(8) | Ag(10)-C(4)    | 2.170(8) |
| Ag(11)-C(4)    | 2.158(8) | Ag(1)⋯Ag(2)    | 2.923(1) | Ag(1)⋯Ag(8)#1  | 2.952(9) |
| Ag(1)⋯Ag(11)#1 | 3.115(1) | Ag(1)⋯Ag(5)    | 3.198(1) | Ag(2)⋯Ag(3)    | 2.898(1) |
| Ag(2)⋯Ag(7)    | 3.022(1) | Ag(2)⋯Ag(11)#1 | 3.308(1) | Ag(3)⋯Ag(7)    | 3.109(9) |
| Ag(3)⋯Ag(4)    | 3.113(1) | Ag(4)⋯Ag(5)    | 2.896(9) | Ag(4)⋯Ag(10)#1 | 3.050(1) |
| Ag(4)⋯Ag(11)#1 | 3.299(1) | Ag(5)⋯Ag(6)    | 2.816(9) | Ag(5)⋯Ag(12)#1 | 3.079(9) |
| Ag(6)⋯Ag(8)    | 3.107(9) | Ag(6)⋯Ag(9)    | 3.191(9) | Ag(6)⋯Ag(7)    | 3.251(1) |
| Ag(7)⋯Ag(8)    | 2.859(9) | Ag(7)⋯Ag(9)    | 3.094(1) | Ag(8)⋯Ag(12)   | 2.836(9) |
| Ag(9)⋯Ag(10)   | 2.991(9) | Ag(9)⋯Ag(12)   | 3.041(9) | Ag(10)⋯Ag(11)  | 2.793(1) |
| <b>2</b>       |          |                |          |                |          |
| C(1)≡C(2)      | 1.245(8) | Ag(1)-C(1)     | 2.220(5) | Ag(6)-C(1)#1   | 2.618(5) |
| Ag(5)-C(1)     | 2.548(5) | Ag(2)-C(1)     | 2.414(5) | Ag(4)-C(1)     | 2.151(6) |
| Ag(1)-C(2)     | 2.187(5) | Ag(7)-C(2)     | 2.302(5) | Ag(5)-C(2)     | 2.417(5) |
| Ag(1)⋯Ag(6)    | 2.834(6) | Ag(1)⋯Ag(7)    | 2.896(6) | Ag(1)⋯Ag(2)    | 3.294(5) |
| Ag(7)⋯Ag(3)    | 3.195(7) | Ag(7)⋯Ag(6)    | 3.372(7) | Ag(3)⋯Ag(4)    | 2.757(7) |
| Ag(2)⋯Ag(3)    | 3.133(5) | Ag(3)⋯Ag(6)#1  | 3.327(7) | Ag(6)⋯Ag(6)#1  | 2.859(9) |
| Ag(6)⋯Ag(5)    | 3.081(7) | Ag(5)⋯Ag(4)    | 3.013(7) |                |          |

**3**

|                 |          |                 |          |                 |          |
|-----------------|----------|-----------------|----------|-----------------|----------|
| C(1)≡C(2)       | 1.238(8) | Ag(4)-C(1)      | 2.982(7) | Ag(2)-C(1)      | 2.188(5) |
| Ag(3)-C(1)      | 2.427(6) | Ag(6)-C(1)      | 2.575(5) | Ag(4)-C(2)      | 2.494(6) |
| Ag(4)-C(2)#2    | 2.643(6) | Ag(3)-C(2)#3    | 2.372(5) | Ag(5)-C(2)      | 2.119(6) |
| Ag(6)-C(2)      | 2.603(5) | Ag(4)···Ag(3)#1 | 2.928(6) | Ag(4)···Ag(1)   | 2.982(7) |
| Ag(4)···Ag(4)#2 | 3.083(9) | Ag(4)···Ag(5)#2 | 3.106(7) | Ag(4)···Ag(5)   | 3.298(7) |
| Ag(4)···Ag(6)   | 3.327(1) | Ag(1)···Ag(2)   | 2.971(7) | Ag(1)···Ag(3)   | 3.156(7) |
| Ag(2)···Ag(6)   | 2.846(8) | Ag(2)···Ag(3)   | 3.136(6) | Ag(3)···Ag(3)#3 | 2.824(9) |
| Ag(3)···Ag(4)#4 | 2.928(6) | Ag(3)···Ag(5)#4 | 3.043(6) | Ag(5)···Ag(6)   | 3.308(8) |

**4**

|                 |          |                 |          |                 |          |
|-----------------|----------|-----------------|----------|-----------------|----------|
| C(1)≡C(2)       | 1.231(2) | Ag(1)-C(1)      | 2.328(1) | Ag(2)-C(1)#1    | 2.670(1) |
| Ag(2)-C(1)      | 2.707(1) | Ag(5)-C(1)      | 2.362(1) | Ag(6)-C(1)      | 2.085(1) |
| Ag(2)-C(2)      | 2.360(1) | Ag(3)-C(2)      | 2.181(1) | Ag(4)-C(2)      | 2.169(1) |
| Ag(5)-C(2)      | 2.624(1) | Ag(1)···Ag(6)   | 2.865(2) | Ag(1)···Ag(2)   | 2.893(1) |
| Ag(1)···Ag(2)#2 | 3.004(1) | Ag(1)···Ag(3)#1 | 3.047(2) | Ag(2)···Ag(4)   | 3.230(2) |
| Ag(2)···Ag(3)   | 3.257(2) | Ag(2)···Ag(3)#1 | 3.268(2) | Ag(2)···Ag(5)   | 3.281(2) |
| Ag(2)···Ag(6)#1 | 3.290(2) | Ag(3)···Ag(4)   | 2.810(2) | Ag(3)···Ag(5)#2 | 3.257(2) |
| Ag(4)···Ag(5)   | 2.863(2) | Ag(4)···Ag(6)#4 | 3.025(2) | Ag(5)···Ag(6)   | 3.213(2) |

**5**

|                 |          |                 |          |                 |          |
|-----------------|----------|-----------------|----------|-----------------|----------|
| C(1)≡C(2)       | 1.220(1) | Ag(1)-C(1)      | 2.300(8) | Ag(2)-C(1)      | 2.178(9) |
| Ag(3)-C(1)      | 2.299(9) | Ag(6)-C(1)      | 2.257(9) | Ag(1)-C(2)#1    | 2.384(9) |
| Ag(3)-C(2)      | 2.480(1) | Ag(4)-C(2)      | 2.169(1) | Ag(5)-C(2)      | 2.155(1) |
| Ag(6)-C(2)      | 2.673(1) | Ag(1)···Ag(1)#1 | 2.745(1) | Ag(1)···Ag(4)#1 | 3.276(9) |
| Ag(2)···Ag(3)   | 2.983(1) | Ag(2)···Ag(6)   | 2.997(1) | Ag(2)···Ag(4)#2 | 3.025(1) |
| Ag(2)···Ag(5)#2 | 3.077(1) | Ag(3)···Ag(4)   | 2.918(1) | Ag(3)···Ag(5)#2 | 3.037(1) |
| Ag(3)···Ag(6)#2 | 3.279(1) | Ag(4)···Ag(5)   | 2.870(1) | Ag(4)···Ag(6)#2 | 3.068(1) |

Ag(5)···Ag(6) 2.871(1)

**6**

|                   |          |                   |          |                 |          |
|-------------------|----------|-------------------|----------|-----------------|----------|
| C(1)≡C(2)         | 1.243(1) | C(3)≡C(4)         | 1.221(1) | Ag(1)-C(1)      | 2.124(1) |
| Ag(2)-C(1)        | 2.149(1) | Ag(5)-C(1)        | 2.610(1) | Ag(6)-C(1)#2    | 2.481(9) |
| Ag(6)-C(1)        | 2.591(1) | Ag(3)-C(2)#2      | 2.181(1) | Ag(4)-C(2)#2    | 2.294(1) |
| Ag(5)-C(2)        | 2.283(1) | Ag(6)-C(2)        | 2.456(9) | Ag(6)-C(2)#2    | 2.461(9) |
| Ag(11)-C(3)#3     | 2.493(1) | Ag(15)-C(3)       | 2.395(9) | Ag(15)-C(3)#3   | 2.491(9) |
| Ag(16)-C(3)#3     | 2.120(9) | Ag(11)-C(4)#3     | 2.359(1) | Ag(12)-C(4)     | 2.251(1) |
| Ag(13)-C(4)       | 2.160(1) | Ag(15)-C(4)#3     | 2.445(9) | Ag(15)-C(4)     | 2.518(9) |
| Ag(1)···Ag(2)     | 2.788(1) | Ag(1)···Ag(4)     | 3.017(1) | Ag(1)···Ag(3)   | 3.076(1) |
| Ag(1)···Ag(5)     | 3.132(1) | Ag(1)···Ag(6)#1   | 3.302(1) | Ag(2)···Ag(3)   | 3.061(1) |
| Ag(3)···Ag(4)     | 2.951(1) | Ag(3)···Ag(5)#2   | 2.989(1) | Ag(3)···Ag(6)#2 | 3.346(1) |
| Ag(4)···Ag(5)     | 3.073(1) | Ag(5)···Ag(6)#1   | 3.334(1) | Ag(5)···Ag(6)#1 | 3.335(1) |
| Ag(11)···Ag(13)#3 | 3.149(1) | Ag(11)···Ag(15)   | 3.176(1) | Ag(11)···Ag(16) | 3.179(1) |
| Ag(11)···Ag(12)   | 3.210(1) | Ag(12)···Ag(13)   | 2.844(1) | Ag(12)···Ag(16) | 2.997(1) |
| Ag(13)···Ag(14)   | 3.082(1) | Ag(13)···Ag(16)   | 3.094(1) | Ag(14)···Ag(16) | 2.807(1) |
| Ag(14)···Ag(15)   | 3.202(1) | Ag(15)···Ag(16)#4 | 3.130(1) |                 |          |

<sup>a</sup> Symmetry transformations used to generate equivalent atoms:

For **1**: #1  $x - 1, y, z$ .

For **2**: #1  $-x + 2, -y + 2, -z$ .

For **3**: #1  $x + 1, y, z$ ; #2  $-x + 2, -y + 2, -z + 1$ ; #3  $-x + 1, -y + 2, -z + 1$ ; #4  $x - 1, y, z$ .

For **4**: #1  $x, -y + \frac{1}{2}, z - \frac{1}{2}$ ; #2  $x, -y + \frac{1}{2}, z + \frac{1}{2}$ .

For **5**: #1  $-x + 1, -y + 1, -z + 1$ ; #2  $-x + 2, -y + 1, -z + 1$ ; #3  $-x + 1, -y + 2, -z + 1$ .

For **6**: #1  $-x - \frac{1}{2}, y - \frac{1}{2}, -z + \frac{1}{2}$ ; #2  $-x - \frac{1}{2}, y + \frac{1}{2}, -z + \frac{1}{2}$ ; #3  $-x + \frac{1}{2}, y - \frac{1}{2}, -z + \frac{1}{2}$ ; #4  $-x + \frac{1}{2}, y + \frac{1}{2}, -z + \frac{1}{2}$ .
